1 **Vitamin A supplement after neonatal *Streptococcus pneumoniae* pneumonia alters CD4<sup>+</sup>T**  
2 **cell subset and inhibits allergic asthma in mice model**

3 Yonglu Tian<sup>a,b\*</sup>, Qinqin Tian<sup>a,b\*</sup>, Yi Wu<sup>a,b</sup>, Xin Peng<sup>a,b</sup>, Yunxiu Chen<sup>a,b</sup>, Qinyuan Li<sup>a,b</sup>, Guangli Zhang<sup>c</sup>, Xiaoyin Tian<sup>a,b</sup>,  
4 Luo Ren<sup>b</sup>, Zhengxiu Luo<sup>c\*</sup>

5 a Key Laboratory of Pediatrics in Chongqing

6 b Department of Children's Hospital of Chongqing Medical University of Education Key Laboratory of  
7 Child Development and Disorders

8 c Department of Respiratory Medicine, Children's Hospital of Chongqing Medical University,  
9 Chongqing, China

10 \*The first author: The first two authors contributed equally to this work

11 \* Corresponding author

12 Correspondence: Department of Respiratory Medicine, Children's Hospital of Chongqing Medical  
13 University, Chongqing, 401122, China

14 Phn: +86-23-61966359 Fax: +86-23-63624479

15 E-mail: [luozhengxiu816@163.com](mailto:luozhengxiu816@163.com)

16 **Abstract:**

17 **Background :** Previously, we showed that neonatal pneumonia caused by *Streptococcus*  
18 *pneumoniae* (*S. pneumoniae*) promoted adulthood ovalbumin (OVA) induced allergic  
19 asthma. Many studies have demonstrated that vitamin A deficiency induced the development of  
20 allergic asthma. Whether neonatal *S. pneumoniae* pneumonia promoted allergic asthma  
21 development was associated with vitamin A concentrations remains unclear.

22 **Methods:** Female BALB/c neonates were infected with *S. pneumoniae* strain D39 and  
23 subsequently treated with vitamin A. Vitamin A concentrations in lung, serum and liver were  
24 monitored on 2, 5, 7, 14, 21, 28 days post infection. Four weeks after infection, mice were  
25 sensitized and challenged with OVA to induce allergic airway disease (AAD) in early adulthood.  
26 Twenty-four hours after the final challenge, lung histo-pathology, cytokine concentrations in  
27 bronchoalveolar lavage fluid (BALF), airway hyperresponsiveness (AHR) and lung CD4<sup>+</sup>T cells  
28 were measured.

29 **Results:** We demonstrated that neonatal *S. pneumoniae* pneumonia induce lung vitamin A  
30 deficiency up to early adulthood. Moreover, neonatal *S. pneumoniae* pneumonia aggravated  
31 airway inflammatory cells accumulation and increased AHR during AAD, decreased Foxp3<sup>+</sup>Treg  
32 and Th1 productions remarkably, while Th2 cell expression was increased significantly. Further  
33 study indicated that vitamin A supplement after neonatal *S. pneumoniae* pneumonia can promote  
34 Foxp3<sup>+</sup>Treg and Th1 productions, decrease Th2 cell expressions, alleviate AHR and inflammatory  
35 cells infiltration during AAD.

36 **Conclusions:** Using a mouse model, we demonstrate that Vitamin A supplement after neonatal

37 Streptococcus pneumoniae pneumonia alters the CD4<sup>+</sup>T cell subset and inhibits the development  
38 of early adulthood allergic asthma.

### 39 **Keywords**

40 Neonatal, *S.pneumoniae* pneumonia, asthma, vitamin A

### 41 **Background**

42 Asthma is a heterogeneous disease, characterized by airway chronic inflammation together with  
43 airway hyperresponsiveness<sup>[1]</sup>. It is more common in childhood, and most adult asthma originate  
44 from childhood indicating that childhood events have an important role in asthma pathogenesis  
45<sup>[2-4]</sup>. Childhood is an important period for the maturation of the immune system, specific infections  
46 may alter immunologic programming, which plays critical role in the progression of allergic  
47 airways disease (AAD)<sup>[5]</sup>. Neonatal infections caused by *Streptococcus pneumoniae* (*S.*  
48 *pneumoniae*), Haemophilus influenzae, Moraxella catarrhalis can increase the risk of bronchiolitis  
49<sup>[6]</sup> and preschool asthma<sup>[7]</sup>. *S. pneumoniae* is the most common bacterial pathogen of community  
50 acquired pneumonia in childhood. Our previous study suggested that neonatal *S. pneumoniae*  
51 pneumonia promoted OVA-induced asthma development<sup>[8]</sup>. Although the prevention and  
52 treatment of asthma induced by *S. pneumoniae* pneumonia is crucial, while it remains indistinctly.  
53 Pneumonia continues to be a serious health issue worldwide; affecting millions annually,  
54 increasing morbidity and mortality globally<sup>[9-12]</sup>. Pneumonia decreases vitamin A levels  
55 significantly in children under five years old<sup>[13]</sup>. Infections may affect vitamin A intake,  
56 absorption, storage, release, distribution and metabolism<sup>[14]</sup>. Vitamin A is predominantly stored in  
57 the liver as retinyl esters with lung being a secondary storage site. Evidence shows that vitamin A  
58 deficiency may be associated with asthmatic development<sup>[15, 16]</sup>. Our previous study indicated that  
59 the severity of vitamin A deficiency was associated with the course and severity of wheezing in  
60 infants<sup>[17]</sup>. Whether neonatal *S. pneumoniae* pneumonia induced adulthood allergic asthma was  
61 associated with vitamin A deficiency remains unclear. In this study, we established a neonatal  
62 non-lethal *S. pneumoniae* pneumonia mouse model and monitored vitamin A levels in lung, serum  
63 and liver until early adulthood. We explored the effects of vitamin A supplement after neonatal *S.*  
64 *pneumoniae* pneumonia on the development of adulthood allergic asthma. Our data demonstrated  
65 that neonatal *S. pneumoniae* pneumonia induced vitamin A deficiency in the lung up to early  
66 adulthood and vitamin A supplement altered the CD4<sup>+</sup>T cell subset and inhibited early adulthood  
67 allergic asthma development in mice.

### 68 **Methods**

#### 69 **Mice**

70 Parturient BALB/C mice were purchased from Animal Resources Centre, Chongqing medical  
71 university. Pregnant mice were kept separately and monitored for births. Newborn female mice  
72 were raised in a pathogen-free environment, and housed at 24°C under a 12h light, 12h dark cycle,  
73 and given a normal diet and water. All experiments performed in mice were permitted by the  
74 Institutional Animal Care and Research Advisory Committee at the Chongqing Medical  
75 University. All experimental animals were used in accordance with the guidelines issued by the  
76 Chinese Council on Animal Care.

#### 77 **Establishment of a Neonatal non-lethal *S. pneumoniae* pneumonia mouse model**

78 Neonatal *S. pneumoniae* pneumonia (*S.pp*) was established according to the procedures described

79 in our previous study. Briefly, *S. pneumoniae* (D39) was plated onto tryptic soy broth (Pangtong,  
80 China), grown for 10-14 hours at 37°C in a 5% CO<sub>2</sub> atmosphere, washed, and suspended in sterile  
81 phosphate buffered saline (PBS). Conscious neonatal (1-week-old) BALB/c mice were infected  
82 intranasally with 2×10<sup>7</sup> CFU of *S. pneumoniae* in 5ul of PBS. Mock-infected mice were injected  
83 intranasally with 5ul of PBS.

#### 84 **Determination of Vitamin A concentrations in tissues**

85 Lung, serum and liver were collected from uninfected controls and neonatal *S. pneumoniae*  
86 pneumonia mice on 2, 5, 7, 14, 21, 28 days post infection. After grinding, the liver and lung were  
87 extracted in ethane. Thereafter the extracted samples and the untreated serum were degassed and  
88 redissolved. Total retinol concentration in lung, liver and serum was determined by high  
89 performance liquid chromatograph (HPLC, Model G1315 A, Agilent Technologies, Palo Alto)  
90 using trimethylmethoxyphenyl-retinol as an internal standard<sup>[18]</sup>.

#### 91 **Establishment of a Vitamin A supplement model**

92 Retinyl palmitate (Sigma) with all-trans retinoic acid (Sigma) in the ratio of 10:1 was dissolved in  
93 rapeseed oil to configure to the vitamin A used for subsequent experiments<sup>[19]</sup>. 24 hours after post  
94 infection, neonates were administrated orally with a dose of 20<sup>IU</sup>/g of vitamin A once daily for  
95 four consecutive days<sup>[20]</sup> to build the vitamin A supplement model.

#### 96 **Induction of Allergic airway disease (AAD)**

97 Four weeks after neonatal *S. pneumoniae* pneumonia infection (mice have matured into early  
98 adulthood in four weeks), mice were divided into the following groups: uninfected non-allergic  
99 (control), uninfected allergic (OVA), infected allergic (*S.pp* /OVA), infected vitamin A  
100 supplement allergic (*S.pp*+VA/OVA). To induce AAD, mice in the OVA, *S.pp* /OVA and  
101 *S.pp*+VA/OVA groups were sensitized with i.p. injections of 100 µg OVA (Sigma-Aldrich, St.  
102 Louis, MO, USA) diluted in 50% aluminum hydroxide gel (Sigma-Aldrich) for a total volume of  
103 200 µL on days 35 and 42. From days 49-52, mice were exposed to 1% OVA aerosols for 30  
104 min/d. Controls were simultaneously sensitized and challenged with sterile PBS. AAD was  
105 assessed within 24 h after the final challenge (Fig 1). Each experiment was repeated three times  
106 with a sample size of a total of four to eight mice per group.

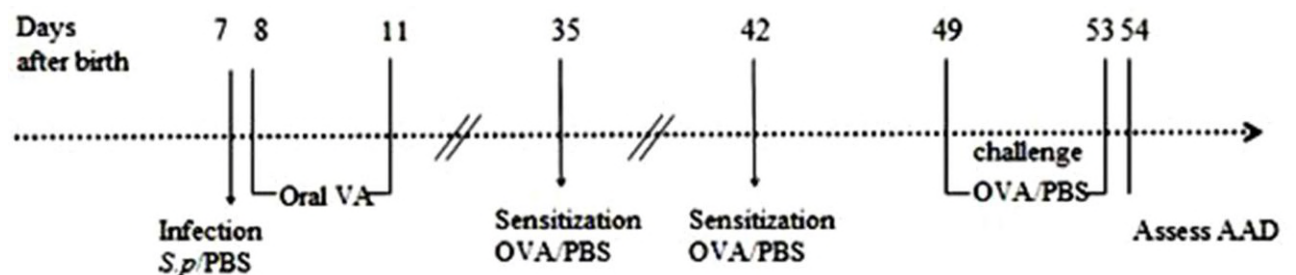

107  
108 **Fig 1 Establishment of models and schematic of study protocol.** Neonatal *S. pneumoniae* pneumonia BALB/c mice were divided into  
109 the following groups: uninfected, non-allergic(Control ), uninfected, allergic(OVA), neonatal infected, allergic(*S.pp* /OVA) and vitamin A  
110 supplement after neonatal infected, allergic (*S.pp*+VA/OVA). Mice were infected intranasally with *S. pneumoniae* or phosphate-buffered  
111 saline (PBS) on day 7 (1 week-old), and supplemented orally with vitamin A on days 8-11. Mice were sensitized by an i.p. injection of  
112 ovalbumin (OVA) or PBS on days 35 and 42, and challenged with aerosolized OVA or PBS to induce allergic airways disease (AAD)  
113 from 49 to 52 days.

#### 114 **Measurement of airway hyperresponsiveness (AHR)**

115 AHR was assessed in vivo by measuring the changes in transpulmonary resistance using a mouse

116 plethysmograph and methods previously described<sup>[21-23]</sup>. Briefly, 24 hours after the final challenge,  
117 AHR was measured in conscious, unrestrained mice by whole-body plethysmography (Emca  
118 instrument; Allmedicus, France). Each mouse was exposed to aerosolized PBS followed by  
119 increasing concentrations of aerosolized methacholine (Sigma-Aldrich, St. Louis, Mo. USA)  
120 solution (3.125, 6.25, 12.5, 25, and 50 mg/ml; Sigma) in PBS for 3 min and then rested for 2 min.  
121 The average Penh for each concentration was calculated from the continuously recorded pressure  
122 and flow data for 5 min. Penh is a dimensionless value and correlates with pulmonary airflow  
123 resistance. It represents a function of the ratio of peak expiratory flow to peak inspiratory flow and  
124 a function of the timing of expiration.

#### 125 **Bronchoalveolar lavage fluid and cell counting**

126 Twenty-four hours after the final challenge, mice were anesthetized with 10% chloral hydrate (0.1  
127 mL/100 g, i.p). Bronchoalveolar lavage fluid (BALF) was obtained by flushing the lungs twice  
128 with 1 ml each of PBS through a cannulated trachea. The two aliquots were then pooled to obtain  
129 one sample for each mouse. Erythrocytes were lysed, and the remaining cells were centrifuged at  
130 3000 rpm for 5 min. Total cell numbers in the BALF were determined using a standard  
131 hemocytometer. Differential cell counts were performed based on standard morphological and  
132 staining characteristics of at least 250 cells per sample. Supernatants were stored at -80°C. All  
133 slides were characterized by a single blinded examiner to eliminate bias.

#### 134 **Histo-pathology of lungs**

135 Twenty-four hours after the final challenge, mice were euthanized by an intraperitoneal injection  
136 of a lethal dose of 10% chloral hydrate (0.3 mL/100 g, i.p.) to harvest the lungs. After fixing in  
137 formaldehyde for 24 hours, lungs were dissected and embedded in paraffin. Four micron thick  
138 sections were stained with hematoxylin and eosin (H&E; Sigma-Aldrich). At least five bronchi  
139 were selected from each mouse based on size (150-350mm in diameter) for analysis. The degree  
140 of airway inflammatory cell infiltration was scored in a single-blind fashion to reduce evaluator  
141 bias. Lung lesions were scored semi-quantitatively using a measurement tool as previously  
142 described<sup>[24]</sup>. Images were captured under a Nikon Eclipse E200 microscope connected to a Nikon  
143 Coolpix 995 camera (Nikon, Tokyo, Japan). The severity of inflammation was evaluated by  
144 assigning a value of 0 point for normal; 1 point for few cells; 2 points for a ring of inflammatory  
145 cells 1 cell layer deep; 3 points for a ring of inflammatory cells 2 to 4 cells deep; 4 points for a  
146 ring of inflammatory cells of >4 cells deep.

#### 147 **BALF cytokines measurements**

148 Concentrations of IL-4, IL-5, IL-13, IL-17A interferon (IFN)- $\gamma$  and TGF- $\beta$  (Xin Bosheng,  
149 Shenzhen, China) in BALF were detected by commercially available enzyme-linked  
150 immunosorbent assay (ELISA) kits according to the manufacturer's instructions.

#### 151 **Flow cytometric analysis of lung CD4<sup>+</sup>T cells**

152 Lungs were minced and incubated 1 mL of RPMI 1640 containing 0.2% collagenase I  
153 (Sigma-Aldrich) for 15 min at 37°C. Single cell suspension was obtained by forcing tissue through  
154 a 70  $\mu$ m cell filter (Becton, Dickinson and Company, Franklin Lakes, NJ, USA) After  
155 centrifugation, 3ml erythrocyte lysis buffer was added to the sediment. Fifteen minutes later, the  
156 cells were then harvested and washed and divided into two aliquots. One aliquot was stained for  
157 surface-associated CD11c-FITC (Rat anti-mouse; EB Biosciences) and CD4-FITC (Rat  
158 anti-mouse, BD Biosciences), CD25-PE (Rat anti-mouse, BD Biosciences.), Foxp3-PEcy5 (Rat

159 anti-mouse, BD Biosciences) and the other was resuspended in RPMI 1640 medium containing  
160 10% fetal bovine serum. The resuspended cells were incubated for 4–6 h at 37°C and 5% CO<sub>2</sub> in  
161 15 ml centrifuge tube in 1 mL medium containing phorbol 12-myristate 13-acetate (50 ng/mL;  
162 Sigma-Aldrich), ionomycin (500 ng/mL; Sigma-Aldrich) and GolgiPlug-containing brefeldin A  
163 (Becton, Dickinson and Company). To detect the subsets of Th1 and Th2 cells in lungs, cells were  
164 stained for intracellular IFN- $\gamma$ -PerCP-Cy5.5 (Rat anti-mouse; Pharmingen), IL-17A-PE (Rat  
165 anti-mouse; Pharmingen), IL-4-APC (Rat anti-mouse; Pharmingen). Stained cells were detected  
166 by flow cytometry (FACS Canto; Becton, Dickinson and Company) and data were analyzed with  
167 CellQuest software (Becton, Dickinson and Company).

## 168 Statistical Analysis

169 Results were analyzed using GraphPad Prism (version 5.0; GraphPad, La Jolla, CA, USA) and  
170 values are expressed as mean  $\pm$  standard error. Statistical analysis was performed by either  
171 one-way analysis of variance (ANOVA) with Tukey's post-test or two-way ANOVA with  
172 Bonferroni's post-test. A value of  $P < 0.05$  was considered significant.

## 173 Results

### 174 Neonatal *S. pneumoniae* pneumonia significantly decreases lung vitamin A levels in BALB/c 175 mouse model

176 To assess if neonatal *S. pneumoniae* pneumonia (*S.pp*) caused vitamin A deficiency, Vitamin A  
177 levels were measured in lung, serum and liver post- infection by HPLC. Results showed that the  
178 pulmonary vitamin A levels were significantly decreased in *S.pp* group as compared with the  
179 control group till early adulthood (Fig 2A). Serum vitamin A levels showed significant decline  
180 seen within the initial 2 weeks normalized over the next 2 weeks after pneumonia (Fig 2B).

181 Vitamin A levels in liver were similar between neonatal *S. pp* and control groups (Fig 2C). These  
182 findings show that neonatal *S. pp* causes lung vitamin A deficiency in murine lungs.

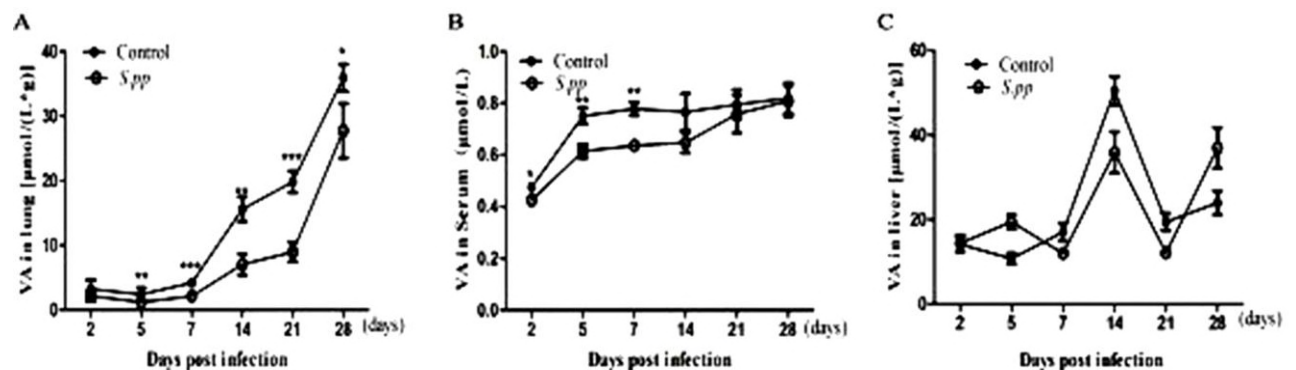

183

184 **Fig 2** Neonatal *S.pp* effects on vitamin A status in lung (A), serum (B) and liver (C) on 2,5,7, 14, 21, 28 days post infection in BALB/C  
185 mice.\*P<0.05, \*\*P<0.01, \*\*\*P<0.001 as compared with the mock-infected (control) group, n=7 mice/group.

### 186 Vitamin A supplement after neonatal *S. pneumoniae* pneumonia suppressed inflammatory 187 cells infiltrate during AAD

188 Twenty-four hours after the final challenge, the total inflammatory cells, eosinophils and  
189 lymphocyte in the BALF from the OVA group were higher than that in the control mice.  
190 Interestingly, accumulation of total inflammatory cells, neutrophils, eosinophils, macrophages and  
191 lymphocyte in *S.pp*/OVA group were significantly increased as compared with the OVA group. In  
192 contrast, the number of total inflammatory cells, neutrophils, eosinophils, macrophages and



193 lymphocyte was dramatically reduced in *S.pp*+VA/OVA group as compared with *S.pp*/OVA mice  
 194 (Fig 3A-E). Our results clearly demonstrate that vitamin A supplement after neonatal *S. pp*  
 195 significantly reduced inflammatory cells infiltration during AAD.

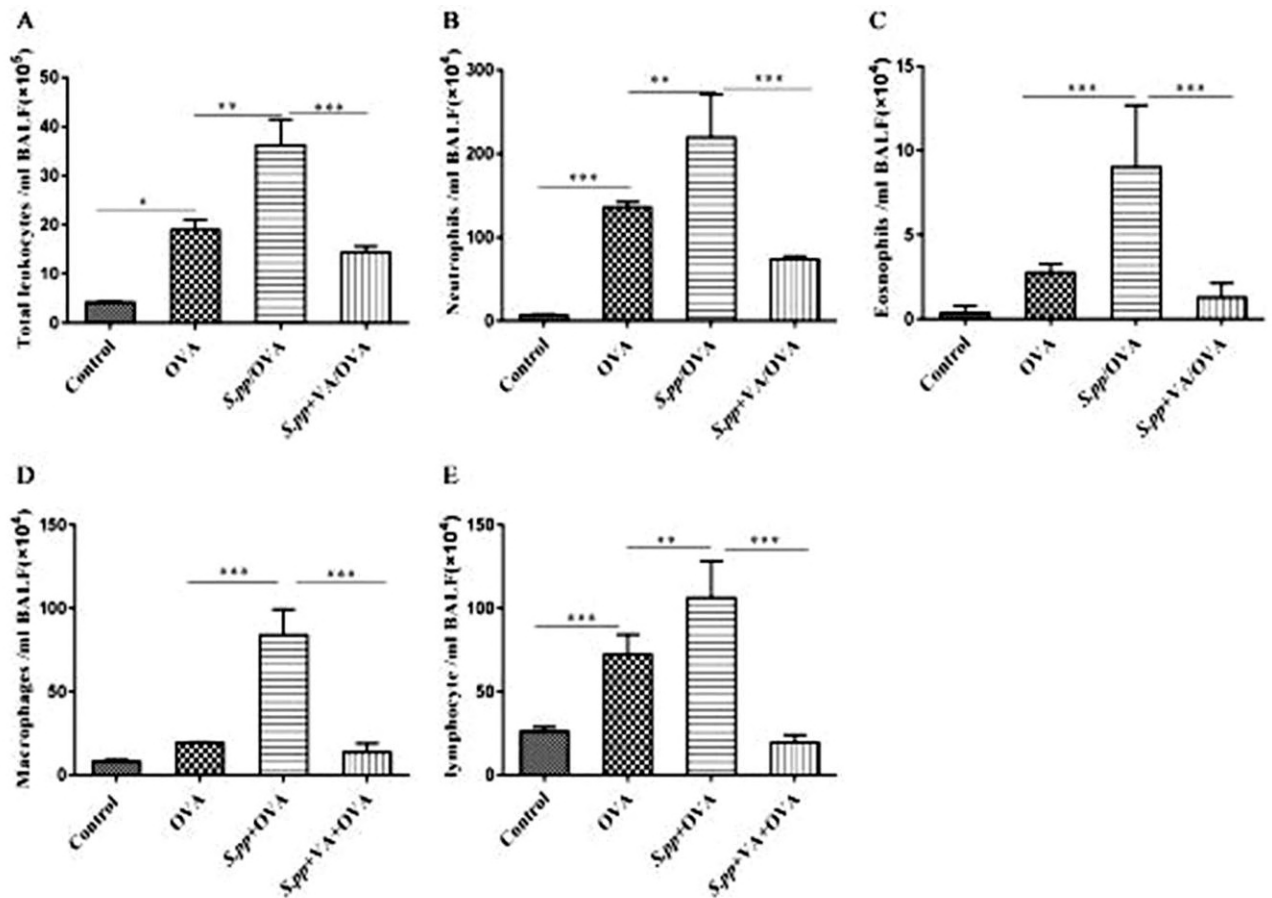

196  
 197 **Fig 3 Vitamin A supplement after neonatal *S. pneumoniae* pneumonia significantly reduced inflammatory cells infiltration during**  
 198 **AAD.** Total cells (A), neutrophils (B), eosinophils (C), macrophages (D) and lymphocyte(E) were counted from bronchoalveolar lavage  
 199 fluid (BALF) collected 24h after the final challenge. Control (uninfected, non-allergic); OVA (uninfected, allergic); *S.pp*/OVA (neonatal  
 200 infected, allergic); *S.pp*+VA/OVA (vitamin A supplementary after neonatal infection, allergic). Data are shown as mean  $\pm$  standard error  
 201 from three separate experiments (n = 6–8 mice/group). \*P<0.05, \*\*P<0.01, \*\*\*P<0.001.

202 Histopathology of the lungs demonstrated neonatal *S. pp* significantly increased the accumulation  
 203 of inflammatory cells around pulmonary alveoli, bronchioles and pulmonary vascular during AAD  
 204 as compared with the control group. However, there were fewer inflammatory cells around  
 205 pulmonary alveoli, bronchioles and pulmonary vascular in *S.pp*+VA/OVA group as compared with  
 206 *S.pp*/OVA mice (Fig.4A-B). The inflammation scores of pulmonary peribronchitis, perivascularitis  
 207 and alveolitis in the *S.pp* /OVA group were significantly higher than the OVA group. In contrast,  
 208 the inflammation scores in *S.pp*+VA/OVA group were lower than the *S.pp* /OVA mice (P<0.05)  
 209 (Fig 4 C-E). Taken together, these results clearly demonstrate that vitamin A supplement after  
 210 neonatal *S. pp* significantly reduces infiltration of inflammatory cells during AAD.

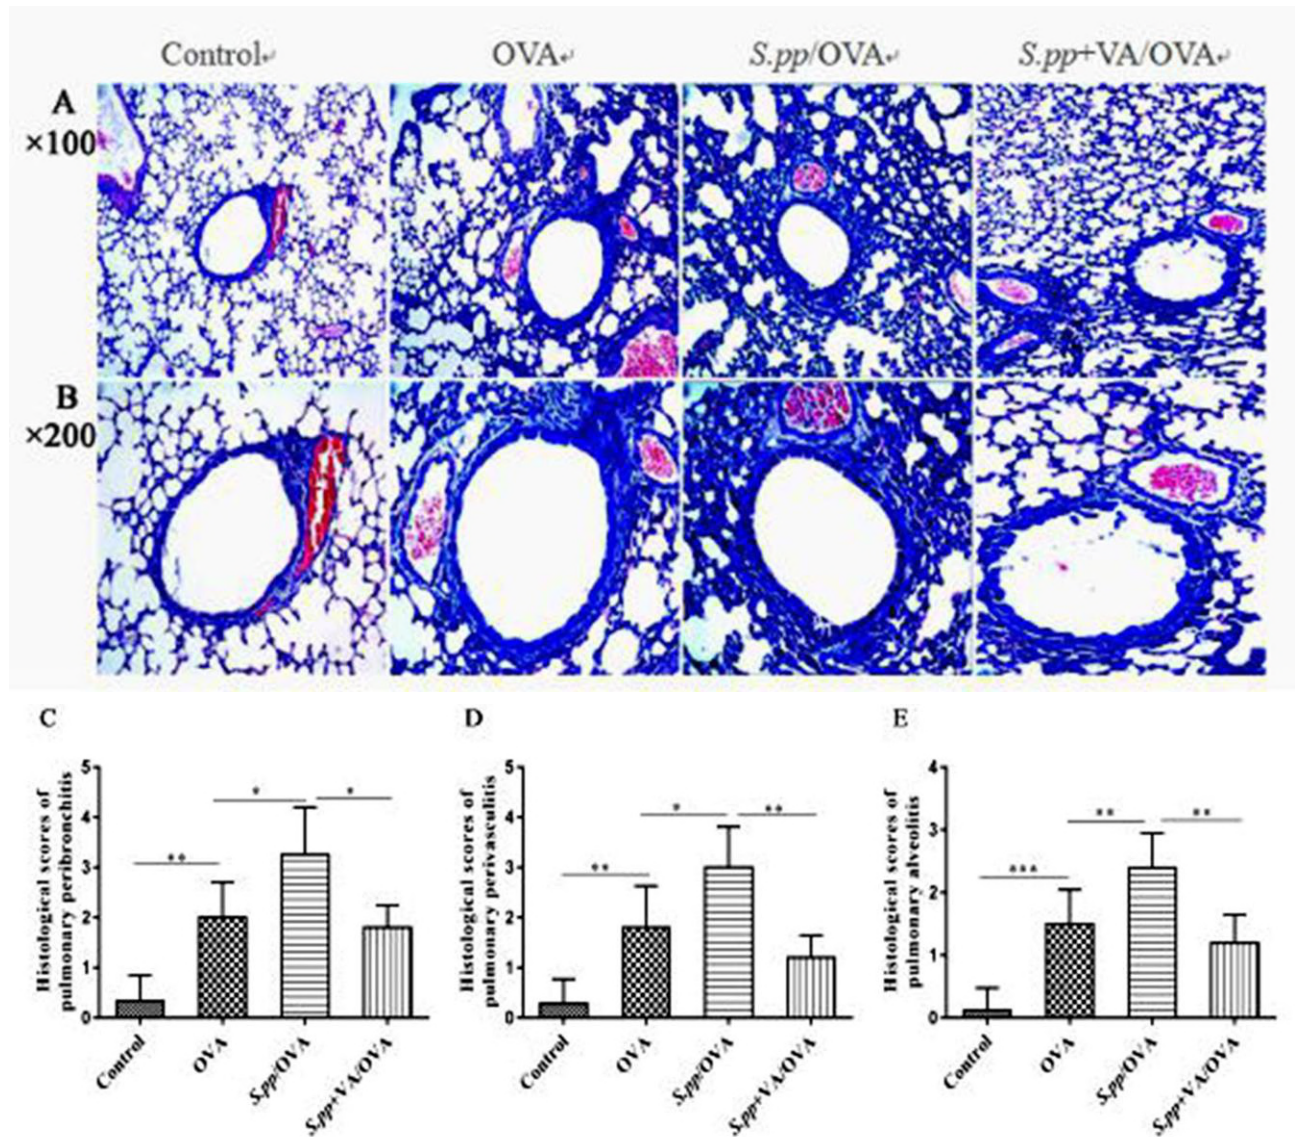

211

212

213 **Fig 4 Vitamin A supplement after neonatal *S. pneumoniae* pneumonia significantly reduced lung inflammation during AAD.**

214 Hematoxylin and eosin (H&E) staining of lung tissue sections from uninfected, non-allergic (Control), uninfected, allergic (OVA),

215 neonatal infected, allergic (*S.pp* /OVA) and vitamin A supplementary after neonatal infection, allergic (*S.pp* +VA/OVA) mice.

216 Magnification: A×100, B×200. Histological scores of pulmonary peribronchitis (C), pulmonary perivasculitis (D) and pulmonary

217 alveolitis (E). Data are shown as mean ± standard error from three separate experiments (n = 6–8 mice/group).\*P<0.05, \*\*P<0.01,

218 \*\*\*P<0.001.

219 **Vitamin A supplement after neonatal *S. pneumoniae* pneumonia decreases AHR during**

220 **AAD**

221 Twenty-four hours after the final challenge, AHR was assessed by calculating the Penh values (i.e.,

222 enhanced respiratory pausing). Treatment with OVA remarkably increased AHR. The Penh value

223 in *S.pp*+OVA group was significantly higher than the OVA group at methacholine concentrations

224 of 12.5mg/ml (4.58±1.77 vs 2.08± 0.59, P<0.001), 25mg/ml (4.76±1.43 vs 2.38± 0.55, P<0.001)

225 and 50.0mg/ml (6.36±1.53 vs 2.74± 0.61, P<0.001). However, the Penh value in *S.pp*+VA/OVA

226 group was significantly lower than *S.pp* /OVA group at methacholine concentrations of 12.5mg/ml

227 (2.63±0.94 vs 4.58±1.77, P<0.001), 25mg/ml (3.06±0.94 vs 4.76±1.43, P<0.001) and 50.0mg/ml

228 (2.90±1.01 vs 6.36±1.53, P<0.001).Vitamin A supplement after neonatal *S. pp* remarkably

229 decreased AHR during AAD (Fig 5).

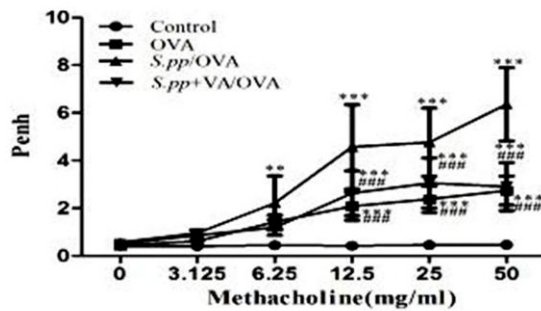

230

231 **Fig.5 Vitamin A supplement after neonatal *S. pneumoniae* pneumonia alleviated AHR during AAD.** Whole-body plethysmography  
 232 in uninfected, non-allergic (Control ), uninfected, allergic (OVA), neonatal infected, allergic (*S.pp* /OVA) and vitamin A supplement after  
 233 neonatal infected, allergic (*S.pp* +VA/OVA) mice was conducted 24h following challenge with methacholine  
 234 (n=6-8mice/group).\*\*P<0.01, \*\*\*P<0.001 as compared with the control group, ####P<0.001 as compared with *S.pp* /OVA group.

235 **Vitamin A supplement after neonatal *S. pneumoniae* pneumonia affect cytokines production**  
 236 **during AAD**

237 Twenty-four hours after the final challenge, BALF was obtained to detect the cytokines by ELISA.  
 238 The productions of IL-4, IL-5, IL-13, IL-17A were significantly higher (P < 0.01), while IFN- $\gamma$   
 239 was significantly lower in the *S.pp*/OVA group compared with the OVA group (P < 0.01).  
 240 However, vitamin A supplement after neonatal *S. pp* dramatically decreased IL-4, IL-5, IL-13,  
 241 IL-17A production and significantly increased IFN- $\gamma$  production in the *S.pp*/OVA group. There  
 242 was no significant difference of TGF- $\beta$  production among OVA, *S.pp*/OVA and *S.pp*+VA/OVA  
 243 groups (Table1).

244

**Table1 Cytokines productions in BALF during AAD (pg/ml)**

| Group               | IL-4                               | IL-5                             | IL-13                             | IL-17A                            | INF- $\gamma$                     | TGF- $\beta$        |
|---------------------|------------------------------------|----------------------------------|-----------------------------------|-----------------------------------|-----------------------------------|---------------------|
| Control             | 169.30 $\pm$ 48.15                 | 18.73 $\pm$ 2.20                 | 16.69 $\pm$ 7.63                  | 289.00 $\pm$ 79.31                | 50.10 $\pm$ 8.88                  | 199.80 $\pm$ 39.90  |
| OVA                 | 447.90 $\pm$ 160.50** <sup>#</sup> | 42.88 $\pm$ 8.70* <sup>###</sup> | 52.43 $\pm$ 21.93* <sup>###</sup> | 536.50 $\pm$ 154.80 <sup>##</sup> | 28.90 $\pm$ 11.16* <sup>###</sup> | 349.8 $\pm$ 148.20* |
| <i>S.pp</i> /OVA    | 669.90 $\pm$ 155.10                | 42.88 $\pm$ 8.70                 | 183.40 $\pm$ 101.20               | 1124.00 $\pm$ 337.30              | 10.06 $\pm$ 6.20                  | 285.40 $\pm$ 81.33  |
| <i>S.pp</i> +VA/OVA | 159.40 $\pm$ 29.22 <sup>###</sup>  | 11.69 $\pm$ 10.68 <sup>###</sup> | 86.18 $\pm$ 26.88 <sup>###</sup>  | 583.20 $\pm$ 119.10 <sup>##</sup> | 43.82 $\pm$ 10.86 <sup>###</sup>  | 297.10 $\pm$ 43.23  |

245 **Table 1** Concentrations of interleukin (IL)-4, IL-5 , IL-13 , IL-17A,interferon (IFN)- $\gamma$ , and transforming growth factor (TGF)- $\beta$  in the  
 246 BALF of uninfected, non-allergic (Control ), uninfected, allergic (OVA), neonatal infected, allergic (*S.pp* /OVA) and vitamin A  
 247 supplement after neonatal infected, allergic (*S.pp*+VA/OVA) mice were measured by ELISA. Data are reported as mean  $\pm$  standard error  
 248 from three separate experiments (n = 6–8 mice/group). \*P<0.05, \*\*P<0.01, \*\*\*P<0.001 as compared with the control group, <sup>#</sup>P<0.05,  
 249 <sup>##</sup>P<0.01, <sup>###</sup>P<0.001 as compared with *S.pp* /OVA group.

250 **Vitamin A supplement after neonatal *S. pneumoniae* pneumonia alters the production of**  
 251 **CD4<sup>+</sup>T cells during AAD**

252 To determine the effects of vitamin A supplement after neonatal *S. pp* on the differentiation of  
 253 CD4<sup>+</sup>T cells differentiation during AAD, flow cytometry was used to analyze the population of  
 254 Foxp3<sup>+</sup>Treg, Th17, Th1and Th2 cells 24h after the final challenge. Data revealed that Foxp3<sup>+</sup>Treg  
 255 and Th1 cells decreased significantly in *S.pp* /OVA group as compared with the OVA group  
 256 (2.75 $\pm$ 0.72% vs 5.30 $\pm$  1.29%, P <0.001,1.13 $\pm$ 0.33% vs 1.59 $\pm$ 0.39%, P <0.05), while Th17 and  
 257 Th2 cells increased (2.40 $\pm$ 0.25% vs1.88 $\pm$ 0.24%, P <0.001, 1.50 $\pm$ 0.17% vs1.05 $\pm$  0.31%, P <0.05 ).  
 258 Vitamin A supplement after neonatal *S. pp* significantly increased Foxp3<sup>+</sup>Treg, Th1 cells  
 259 production as compared with the *S.pp* /OVA group (5.64 $\pm$ 2.11% vs 2.75 $\pm$  0.72%, P <0.001,



260 2.27±0.36% vs 1.13±0.33%, P <0.01), while the number of Th17 and Th2 cells significantly  
261 decreased (1.93±0.12% vs 2.40±0.25%, P <0.001, 0.78±0.31% vs 1.50± 0.17%, P <0.01). Thus,  
262 vitamin A supplement after neonatal *S. pp* promoted Foxp3<sup>+</sup>Treg and Th1 cells during AAD (Fig  
263 6A-D).

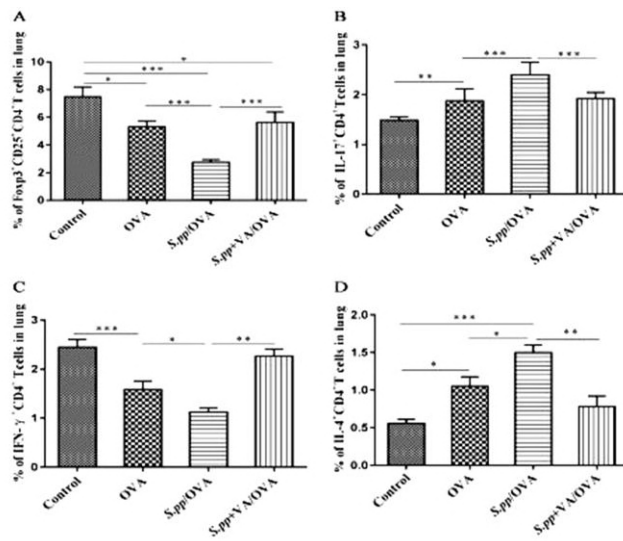

264

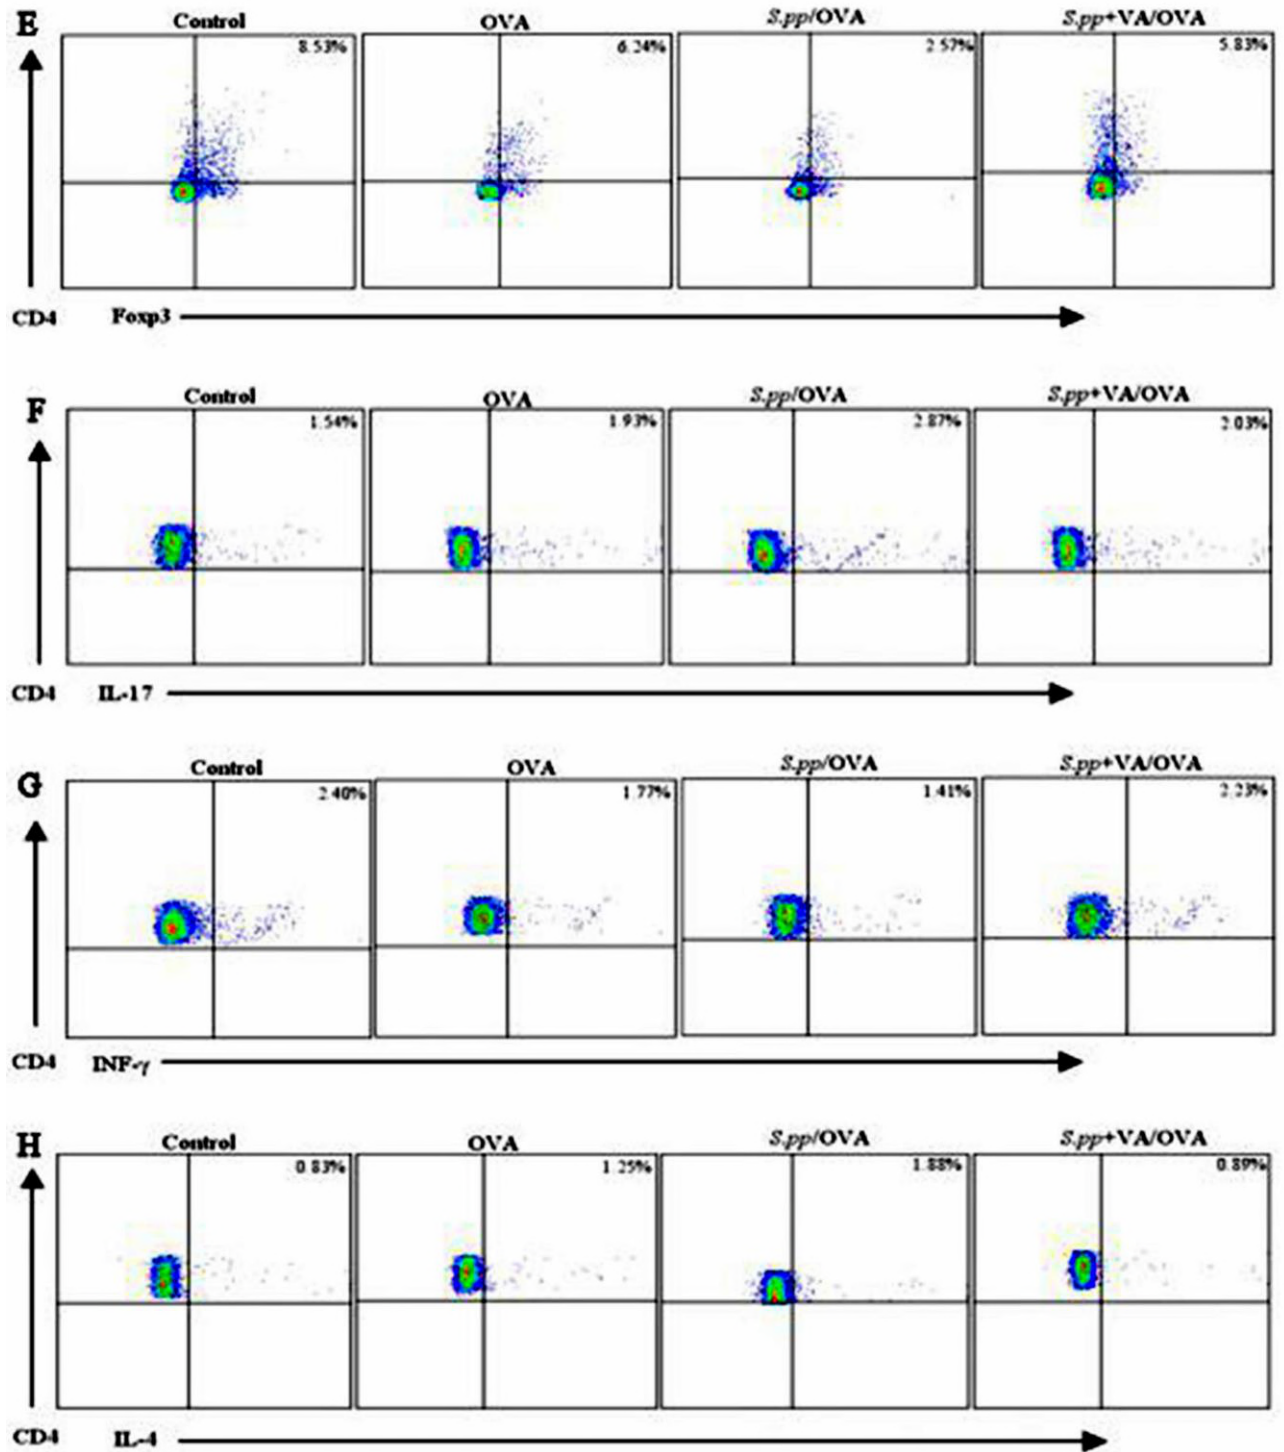

265

266 Fig 6 Vitamin A supplement after neonatal *S. pneumoniae* pneumonia altered CD4<sup>+</sup>T cells productions during AAD.

267 Foxp3<sup>+</sup>Treg(A), Th17(B), Th1(C) and Th2(D) cells productions were measured in uninfected, non-allergic (Control), uninfected,

268 allergic (OVA), neonatal infected, allergic (*S.pp*/OVA) and vitamin A supplement after neonatal infected, allergic (*S.pp*+VA/OVA) mice.

269 The data (E–H), respectively, represent, percentages of positively stained cells of Foxp3<sup>+</sup>Treg, Th1, Th2 and Th17 within the lymphocyte

270 gate of lung in BALB/c mice. (n=6–8 mice/group). \*P<0.05, \*\*P<0.01, \*\*\*P<0.001.

## 271 Discussion

272 Asthma is one of the most common chronic diseases in children<sup>[25]</sup>. Epidemiological studies have demonstrated the association between early-life infections and subsequent asthma development<sup>[26]</sup>.

273

274 <sup>27]</sup>. It is now well accepted that asthma is a heterogeneous syndrome with many clinical subtypes.  
275 Viral infections have been implicated in asthma pathogenesis as well as exacerbation <sup>[28-31]</sup>.  
276 Infection by atypical pathogen (such as *Mycoplasma pneumoniae*) also appears to play important  
277 role in the induction and exacerbation of asthma both in children and adults <sup>[32, 33]</sup>. Recent studies  
278 suggest some bacterial infection have important role in asthma pathogenesis <sup>[34, 35]</sup>. Clinical study  
279 stated acute episodes of wheezing in some children are closely associated with bacterial infection  
280 <sup>[32]</sup> and *S. pneumoniae* infection may increase the risk of asthma exacerbation <sup>[36]</sup>. Our previous  
281 study indicated that neonatal *S. pneumoniae* pneumonia promoted early adulthood allergic asthma  
282 development <sup>[8]</sup>. Pneumonia decreases vitamin A levels significantly in children under five years  
283 old <sup>[13]</sup>. In this study, we monitored vitamin A levels after *S. pp* and investigated the effect of  
284 vitamin A supplement post-infection on the development of allergic asthma. Our findings  
285 demonstrated that neonatal *S. pneumoniae* pneumonia induced lung vitamin A deficiency up to  
286 early adulthood, vitamin A supplement after neonatal *S. pneumoniae* pneumonia inhibited the  
287 recruitment of airway neutrophils and eosinophils, alleviated airway inflammation and decreased  
288 AHR during AAD. Vitamin A supplement not only promoted Foxp3<sup>+</sup>Treg and Th1 cells, but also  
289 inhibit Th2 cells production, which resulted in increased IFN- $\gamma$  productions, decreased type II  
290 cytokines and IL-17A expressions during AAD. Our results indicate that vitamin A supplement  
291 after neonatal *S. pneumoniae* pneumonia alters lung CD4<sup>+</sup>T cell subsets and prevents subsequent  
292 allergic asthma development.  
293 Others have reported that retinol was decreased in LPS or rhIL-6 treated infant rats <sup>[18, 37]</sup>, and in  
294 human infants and young children who have *S. pneumoniae* or other infections <sup>[14, 38, 39]</sup>. Similarly,  
295 we showed that neonatal *S. pneumoniae* pneumonia decreased lung vitamin A levels until early  
296 adulthood in mice. In contrast, Katherine et al <sup>[9]</sup> found no significant differences in vitamin A level  
297 in serum and lung between *S. pneumoniae* infected and mock-infected adult mice, indicating that *S.*  
298 *pneumoniae* infection at different periods of life may induce different effects on vitamin A levels.  
299 Possible explanations for lung vitamin A deficiency after neonatal *S. pneumoniae* pneumonia  
300 include: 1) insufficient vitamin A storage in neonates; 2) increased vitamin A consumption: fast  
301 growth in neonates increases the need of vitamin A, repairing the damaged epithelial may increase  
302 vitamin A consumption <sup>[13]</sup>; 3) vitamin A deficiency may reduce retinol binding protein (RBP)  
303 production, leading to decreased mobilization of vitamin A from liver <sup>[18]</sup>; 4) ordinary food  
304 supply after neonatal pneumonia is insufficient to restore vitamin A concentrations <sup>[40]</sup>.  
305 Epidemiologically vitamin A deficiency is common in asthmatic patients <sup>[17, 41-43]</sup>. Whether  
306 vitamin A deficiency induces asthma development or asthma cause vitamin A deficiency is not  
307 clearly understood. Growing evidence demonstrate that vitamin A directs immune cell  
308 differentiation and induces allergic disease. Intestinal studies in vivo and in vitro showed that  
309 sufficient retinoic acid (A kind of metabolites of vitamin A) can promote regulatory T cells  
310 productions <sup>[44, 45]</sup>. Akiko et al <sup>[46]</sup> stated the differentiation of Foxp3<sup>+</sup>Treg from naïve CD4<sup>+</sup>T cell  
311 is decreased in vitamin A deficient mice. Animal studies suggest that sufficient vitamin A can  
312 suppress Th2 reaction and promote Foxp3<sup>+</sup>Treg and Th1 cells productions <sup>[47-49]</sup>. Consistent with  
313 these reports, our data showed that neonatal *S. pneumoniae* pneumonia reduced Foxp3<sup>+</sup>Treg and  
314 Th1 productions, increased Th2 cells during AAD, which aggravated allergic inflammation.  
315 Vitamin A supplement after neonatal *S. pneumoniae* pneumonia may inhibit asthma development  
316 by inducing Foxp3<sup>+</sup>Treg and Th1 cells productions. Thus, our study indicates that neonatal *S.*  
317 *pneumoniae* pneumonia induces lung vitamin A deficiency alters local CD4<sup>+</sup>T cell differentiation

318 during AAD and promotes subsequent development of allergic asthma.  
319 Studies have reported negative correlation between vitamin A levels and the risk of asthma  
320 development <sup>[16, 52, 53]</sup>, while there has controversy between vitamin A supplement and asthma.  
321 Some studies demonstrated that sufficient vitamin A inhibit asthma or allergic disease by  
322 downregulating oxidative stress <sup>[54]</sup>, or via direct effects on the immune system <sup>[49, 55-57]</sup>. A recent  
323 study demonstrated dexamethasone therapy alone could not relieve allergic asthma airway  
324 epithelium injury, but combined with vitamin A promoted epithelium repair by down-regulating  
325 leucine zipper (GILZ) expression and activating MAPK-ERK signaling <sup>[58]</sup>. However, there are  
326 some studies also suggest association of vitamin A supplement with increased risk of asthma.  
327 Some clinical studies found infants supplemented vitamins A or multivitamin showed increased  
328 risk of allergic disease <sup>[59, 60]</sup>. In addition, a study in Norwegian adults showed that daily intake of  
329 cod liver oil (rich in vitamin A) for  $\geq 1$  month significantly increased the incidence of adult-onset  
330 asthma <sup>[61]</sup>. One possible explanation for these inconsistencies is that excessive vitamin A may  
331 lead to its accumulation in the lung and hypervitaminosis A <sup>[62]</sup>. Hypervitaminosis A has been  
332 reported to be associated with airway hyperresponsiveness in mice model <sup>[63]</sup>. These findings  
333 suggest that hypervitaminosis A may increase the risk of asthma in response to allergens.  
334 Our study indicated that neonatal *S. pneumoniae* pneumonia resulted in lung vitamin A deficiency  
335 and promoted subsequent allergic asthma development. Vitamin A supplementation after neonatal  
336 *S. pneumoniae* pneumonia promoted Foxp3<sup>+</sup>Treg and Th1 productions, reduced Th2 cell  
337 expressions when exposed to the allergen, which resulted in AHR and alleviated infiltration by  
338 inflammatory cells infiltration alleviation, and eventually inhibit adulthood allergic asthma  
339 development in mice model. Our finding may provide a novel strategy for the prevention of  
340 allergic asthma induced by *S. pneumoniae* pneumonia. While further researches are needed to  
341 explore the mechanisms in which neonatal *S.pneumoiae* pneumonia induces vitamin A deficiency.  
342 More studies are needed to clarify whether our results can to be extrapolated to other pathogens  
343 and other animals.

#### 344 **Conclusions**

345 Using a mouse model, we demonstrate that Vitamin A supplement after neonatal Streptococcus  
346 pneumoniae pneumonia alters the CD4<sup>+</sup>T cell subset and inhibits the development of early  
347 adulthood allergic asthma.

#### 348 **Abbreviations**

349 **AAD**:allergic airway disease    **AHR**:airway hyperresponsiveness  
350 **ANOVA**:one-way analysis of variance    **BALF**:bronchoalveolar lavage fluid  
351 **HPLC**:high performance liquid chromatograph    **OVA**:ovalbumin  
352 **PBS**:phosphate buffered saline    ***S. pneumoniae***:*Streptococcus pneumoniae*  
353 ***S.pp***:*S. pneumoniae* pneumonia

#### 354 **Declarations**

#### 355 **Ethics approval and consent to participate**

356 All experiments performed in mice were permitted by the Institutional Animal Care and Research  
357 Advisory Committee at the Chongqing Medical University. All experimental animals were used in  
358 accordance with the guidelines issued by the Chinese Council on Animal Care.

#### 359 **Acknowledgments**

360 We thank the Department of Laboratory Medicine, Key Laboratory of Diagnostic Medicine,  
361 Chongqing Medical University for providing the *S.pneumoniae* strain D39. We also thank the



362 Experimental Animal Center at Chongqing Medical University for providing the BALB/c mice.

### 363 **Funding**

364 This work was supported by the National Natural Science Foundation of China (81270086,  
365 814700222), the Science and Technology Department of Chongqing (cstc2017jcyjB0160), the  
366 Science and Technology Department of Yuzhong district, Chongqing (20170120).

### 367 **Availability of data and materials**

368 The datasets used and/or analyzed during the current study are available from the corresponding  
369 author on reasonable request.

### 370 **Authors' contributions**

371 Study design: YT, QT, YW, XP, ZL; conducting experiments: YT, QT, YW, XP; acquiring data:  
372 YC, QL, GZ, XT, LR; analyzing data: YT, QT, YW; writing the manuscript: YT, QT, XP. All  
373 authors read and approved the final manuscript.

### 374 **Consent for publication**

375 Not applicable

### 376 **Competing interests**

377 All authors: No reported conflicts. All authors have submitted the ICMJE Form for Disclosure of  
378 Potential Conflicts of Interest. Conflicts that the editors consider relevant to the content of the  
379 manuscript have been disclosed.

## 380 **References**

381

- 382 [1] Chawes BL. Low-grade disease activity in early life precedes childhood asthma and allergy. *Dan Med J.*  
383 2016. 63(8).
- 384 [2] Piippo-Savolainen E, Remes S, Kannisto S, Korhonen K, Korppi M. Early predictors for adult asthma and  
385 lung function abnormalities in infants hospitalized for bronchiolitis: a prospective 18- to 20-year follow-up.  
386 *Allergy Asthma Proc.* 2006. 27(4): 341-9.
- 387 [3] Sears MR, Greene JM, Willan AR, et al. A longitudinal, population-based, cohort study of childhood  
388 asthma followed to adulthood. *N Engl J Med.* 2003. 349(15): 1414-22.
- 389 [4] von ME. Paediatric origins of adult lung disease. *Thorax.* 2001. 56(2): 153-7.
- 390 [5] Lodge CJ, Dharmage SC. Breastfeeding and perinatal exposure, and the risk of asthma and allergies. *Curr*  
391 *Opin Allergy Clin Immunol.* 2016. 16(3): 231-6.
- 392 [6] Vissing NH, Chawes BL, Bisgaard H. Increased risk of pneumonia and bronchiolitis after bacterial  
393 colonization of the airways as neonates. *Am J Respir Crit Care Med.* 2013. 188(10): 1246-52.
- 394 [7] Korppi M. Management of bacterial infections in children with asthma. *Expert Rev Anti Infect Ther.* 2009.  
395 7(7): 869-77.
- 396 [8] Yang B, Liu R, Yang T, et al. Neonatal *Streptococcus pneumoniae* infection may aggravate adulthood  
397 allergic airways disease in association with IL-17A. *PLoS One.* 2015. 10(3): e0123010.
- 398 [9] Restori KH, McDaniel KL, Wray AE, Cantorna MT, Ross AC. *Streptococcus pneumoniae*-induced  
399 pneumonia and *Citrobacter rodentium*-induced gut infection differentially alter vitamin A concentrations in  
400 the lung and liver of mice. *J Nutr.* 2014. 144(3): 392-8.
- 401 [10] Pneumococcal conjugate vaccine for childhood immunization--WHO position paper. *Wkly Epidemiol Rec.*  
402 2007. 82(12): 93-104.
- 403 [11] Sommer A. Moving from science to public health programs: lessons from vitamin A. *Am J Clin Nutr.* 1998.  
404 68(2 Suppl): 513S-516S.
- 405 [12] Potential interventions for the prevention of childhood pneumonia in developing countries: a meta-analysis

- 406 of data from field trials to assess the impact of vitamin A supplementation on pneumonia morbidity and  
407 mortality. The Vitamin A and Pneumonia Working Group. *Bull World Health Organ.* 1995. 73(5): 609-19.
- 408 [13] Reyes H, Villalpando S, Pérez-Cuevas R, et al. Frequency and determinants of vitamin A deficiency in  
409 children under 5 years of age with pneumonia. *Arch Med Res.* 2002. 33(2): 180-5.
- 410 [14] Stephensen CB. Vitamin A, infection, and immune function. *Annu Rev Nutr.* 2001. 21: 167-92.
- 411 [15] Julia V, Macia L, Dombrowicz D. The impact of diet on asthma and allergic diseases. *Nat Rev Immunol.*  
412 2015. 15(5): 308-22.
- 413 [16] Nurmatov U, Devereux G, Sheikh A. Nutrients and foods for the primary prevention of asthma and allergy:  
414 systematic review and meta-analysis. *J Allergy Clin Immunol.* 2011. 127(3): 724-33.e1-30.
- 415 [17] Luo ZX, Liu EM, Luo J, et al. Vitamin A deficiency and wheezing. *World J Pediatr.* 2010. 6(1): 81-4.
- 416 [18] Rosales FJ, Ritter SJ, Zolfaghari R, Smith JE, Ross AC. Effects of acute inflammation on plasma retinol,  
417 retinol-binding protein, and its mRNA in the liver and kidneys of vitamin A-sufficient rats. *J Lipid Res.*  
418 1996. 37(5): 962-71.
- 419 [19] Ross AC, Li NQ, Wu L. The components of VARA, a nutrient-metabolite combination of vitamin A and  
420 retinoic acid, act efficiently together and separately to increase retinyl esters in the lungs of neonatal rats. *J*  
421 *Nutr.* 2006. 136(11): 2803-7.
- 422 [20] James ML, Ross AC, Bulger A, Philips JB, Ambalavanan N. Vitamin A and retinoic acid act synergistically  
423 to increase lung retinyl esters during normoxia and reduce hyperoxic lung injury in newborn mice. *Pediatr*  
424 *Res.* 2010. 67(6): 591-7.
- 425 [21] Deng Y, Chen W, Zang N, et al. The antiasthma effect of neonatal BCG vaccination does not depend on the  
426 Th17/Th1 but IL-17/IFN- $\gamma$  balance in a BALB/c mouse asthma model. *J Clin Immunol.* 2011. 31(3):  
427 419-29.
- 428 [22] Zang N, Xie X, Deng Y, et al. Resveratrol-mediated gamma interferon reduction prevents airway  
429 inflammation and airway hyperresponsiveness in respiratory syncytial virus-infected immunocompromised  
430 mice. *J Virol.* 2011. 85(24): 13061-8.
- 431 [23] Zhang L, Gao H, Yang T, et al. Infant 7-valent pneumococcal conjugate vaccine immunization alters young  
432 adulthood CD4(+)T cell subsets in allergic airway disease mouse model. *Vaccine.* 2014. 32(18): 2079-85.
- 433 [24] Myou S, Leff AR, Myo S, et al. Blockade of inflammation and airway hyperresponsiveness in  
434 immune-sensitized mice by dominant-negative phosphoinositide 3-kinase-TAT. *J Exp Med.* 2003. 198(10):  
435 1573-82.
- 436 [25] Vos T, Flaxman AD, Naghavi M, et al. Years lived with disability (YLDs) for 1160 sequelae of 289 diseases  
437 and injuries 1990-2010: a systematic analysis for the Global Burden of Disease Study 2010. *Lancet.* 2012.  
438 380(9859): 2163-96.
- 439 [26] Cabieses B, Uphoff E, Pinart M, Antó JM, Wright J. A systematic review on the development of asthma  
440 and allergic diseases in relation to international immigration: the leading role of the environment confirmed.  
441 *PLoS One.* 2014. 9(8): e105347.
- 442 [27] Ducharme FM, Tse SM, Chauhan B. Diagnosis, management, and prognosis of preschool wheeze. *Lancet.*  
443 2014. 383(9928): 1593-604.
- 444 [28] Kusel MM, de Klerk NH, Keadze T, et al. Early-life respiratory viral infections, atopic sensitization, and  
445 risk of subsequent development of persistent asthma. *J Allergy Clin Immunol.* 2007. 119(5): 1105-10.
- 446 [29] Webley WC, Hahn DL. Infection-mediated asthma: etiology, mechanisms and treatment options, with focus  
447 on *Chlamydia pneumoniae* and macrolides. *Respir Res.* 2017. 18(1): 98.
- 448 [30] Al-Garawi A, Fattouh R, Botelho F, et al. Influenza A facilitates sensitization to house dust mite in infant  
449 mice leading to an asthma phenotype in adulthood. *Mucosal Immunol.* 2011. 4(6): 682-94.

- 450 [31] Rosas-Salazar C, Shilts MH, Tovchigrechko A, et al. Nasopharyngeal Microbiome in Respiratory Syncytial  
451 Virus Resembles Profile Associated with Increased Childhood Asthma Risk. *Am J Respir Crit Care Med.*  
452 2016. 193(10): 1180-3.
- 453 [32] Bisgaard H, Hermansen MN, Bønnelykke K, et al. Association of bacteria and viruses with wheezy  
454 episodes in young children: prospective birth cohort study. *BMJ.* 2010. 341: c4978.
- 455 [33] Annagür A, Kendirli SG, Yilmaz M, Altintas DU, Inal A. Is there any relationship between asthma and  
456 asthma attack in children and atypical bacterial infections; *Chlamydia pneumoniae*, *Mycoplasma*  
457 *pneumoniae* and *Helicobacter pylori*. *J Trop Pediatr.* 2007. 53(5): 313-8.
- 458 [34] Reibman J, Marmor M, Filner J, et al. Asthma is inversely associated with *Helicobacter pylori* status in an  
459 urban population. *PLoS One.* 2008. 3(12): e4060.
- 460 [35] Essilfie AT, Simpson JL, Horvat JC, et al. *Haemophilus influenzae* infection drives IL-17-mediated  
461 neutrophilic allergic airways disease. *PLoS Pathog.* 2011. 7(10): e1002244.
- 462 [36] Kloepfer KM, Lee WM, Pappas TE, et al. Detection of pathogenic bacteria during rhinovirus infection is  
463 associated with increased respiratory symptoms and asthma exacerbations. *J Allergy Clin Immunol.* 2014.  
464 133(5): 1301-7, 1307.e1-3.
- 465 [37] Gieng SH, Green MH, Green JB, Rosales FJ. Model-based compartmental analysis indicates a reduced  
466 mobilization of hepatic vitamin A during inflammation in rats. *J Lipid Res.* 2007. 48(4): 904-13.
- 467 [38] Velasquez-Melendez G, Okani ET, Kiertsman B, Roncada MJ. Vitamin A status in children with pneumonia.  
468 *Eur J Clin Nutr.* 1995. 49(5): 379-84.
- 469 [39] Jiang YL, Peng DH. [Serum level of vitamin A in children with pneumonia aged less than 3 years].  
470 *Zhongguo Dang Dai Er Ke Za Zhi.* 2016. 18(10): 980-983.
- 471 [40] Rice AL, Stoltzfus RJ, de Francisco A, Chakraborty J, Kjolhede CL, Wahed MA. Maternal vitamin A or  
472 beta-carotene supplementation in lactating bangladeshi women benefits mothers and infants but does not  
473 prevent subclinical deficiency. *J Nutr.* 1999. 129(2): 356-65.
- 474 [41] Al SAM. Serum vitamin A and beta-carotene levels in children with asthma. *J Asthma.* 2009. 46(7):  
475 699-702.
- 476 [42] Arora P, Kumar V, Batra S. Vitamin A status in children with asthma. *Pediatr Allergy Immunol.* 2002. 13(3):  
477 223-6.
- 478 [43] Grieger JA, Wood LG, Clifton VL. Improving asthma during pregnancy with dietary antioxidants: the  
479 current evidence. *Nutrients.* 2013. 5(8): 3212-34.
- 480 [44] Coombes JL, Siddiqui KR, Arancibia-Cárcamo CV, et al. A functionally specialized population of mucosal  
481 CD103<sup>+</sup> DCs induces Foxp3<sup>+</sup> regulatory T cells via a TGF-beta and retinoic acid-dependent mechanism. *J*  
482 *Exp Med.* 2007. 204(8): 1757-64.
- 483 [45] Yokota A, Takeuchi H, Maeda N, et al. GM-CSF and IL-4 synergistically trigger dendritic cells to acquire  
484 retinoic acid-producing capacity. *Int Immunol.* 2009. 21(4): 361-77.
- 485 [46] Nakamoto A, Shuto E, Tsutsumi R, Nakamoto M, Nii Y, Sakai T. Vitamin A Deficiency Impairs Induction  
486 of Oral Tolerance in Mice. *J Nutr Sci Vitaminol (Tokyo).* 2015. 61(2): 147-53.
- 487 [47] Brown CC, Esterhazy D, Sarde A, et al. Retinoic acid is essential for Th1 cell lineage stability and prevents  
488 transition to a Th17 cell program. *Immunity.* 2015. 42(3): 499-511.
- 489 [48] Cui W, Zhang P, Gu J, et al. Vitamin A Deficiency Promotes Inflammation by Induction of Type 2  
490 Cytokines in Experimental Ovalbumin-Induced Asthma Murine Model. *Inflammation.* 2016. 39(5):  
491 1798-804.
- 492 [49] Mucida D, Park Y, Kim G, et al. Reciprocal TH17 and regulatory T cell differentiation mediated by retinoic  
493 acid. *Science.* 2007. 317(5835): 256-60.

- 494 [50] Platts-Mills TA. The allergy epidemics: 1870-2010. *J Allergy Clin Immunol.* 2015. 136(1): 3-13.
- 495 [51] Braman SS. The global burden of asthma. *Chest.* 2006. 130(1 Suppl): 4S-12S.
- 496 [52] Han YY, Blatter J, Brehm JM, Forno E, Litonjua AA, Celedón JC. Diet and asthma: vitamins and methyl  
497 donors. *Lancet Respir Med.* 2013. 1(10): 813-22.
- 498 [53] Thorburn AN, Macia L, Mackay CR. Diet, metabolites, and "western-lifestyle" inflammatory diseases.  
499 *Immunity.* 2014. 40(6): 833-42.
- 500 [54] Paiva SA, Russell RM. Beta-carotene and other carotenoids as antioxidants. *J Am Coll Nutr.* 1999. 18(5):  
501 426-33.
- 502 [55] Mora JR, Iwata M, von AUH. Vitamin effects on the immune system: vitamins A and D take centre stage.  
503 *Nat Rev Immunol.* 2008. 8(9): 685-98.
- 504 [56] Benson MJ, Pino-Lagos K, Roseblatt M, Noelle RJ. All-trans retinoic acid mediates enhanced T reg cell  
505 growth, differentiation, and gut homing in the face of high levels of co-stimulation. *J Exp Med.* 2007.  
506 204(8): 1765-74.
- 507 [57] Sun CM, Hall JA, Blank RB, et al. Small intestine lamina propria dendritic cells promote de novo  
508 generation of Foxp3 T reg cells via retinoic acid. *J Exp Med.* 2007. 204(8): 1775-85.
- 509 [58] Niu C, Liu N, Liu J, et al. Vitamin A maintains the airway epithelium in a murine model of asthma by  
510 suppressing glucocorticoid-induced leucine zipper. *Clin Exp Allergy.* 2016. 46(6): 848-60.
- 511 [59] Checkley W, West KP, Wise RA, et al. Supplementation with vitamin A early in life and subsequent risk of  
512 asthma. *Eur Respir J.* 2011. 38(6): 1310-9.
- 513 [60] Milner JD, Stein DM, McCarter R, Moon RY. Early infant multivitamin supplementation is associated with  
514 increased risk for food allergy and asthma. *Pediatrics.* 2004. 114(1): 27-32.
- 515 [61] Mai XM, Langhammer A, Chen Y, Camargo CA. Cod liver oil intake and incidence of asthma in  
516 Norwegian adults--the HUNT study. *Thorax.* 2013. 68(1): 25-30.
- 517 [62] Mawson AR. Could bronchial asthma be an endogenous, pulmonary expression of retinoid intoxication.  
518 *Front Biosci.* 2001. 6: D973-85.
- 519 [63] Thorne PS, Hawk C, Kaliszewski SD, Guiney PD. The noninvasive mouse ear swelling assay. I. Refinements  
520 for detecting weak contact sensitizers. *Fundam Appl Toxicol.* 1991. 17(4): 790-806.
